# Supplementary material for: Pursuing Clinical Predictors and Biomarkers for Progression in ILD: Analysis of the Pulmonary Fibrosis Foundation (PFF) Registry
Source: PubMed Central journal article supplement (PMC11142961; doi:10.1007/s00408-024-00694-2), 2024-05-16
Supplement: 408_2024_694_MOESM1_ESM.pdf [file 408_2024_694_MOESM1_ESM.pdf]

**Supplementary Table 1**

| <b>Full Cohort<br/>Baseline Characteristic</b>                                       | <b>IPF<br/>(N=575)</b>                                                                   | <b>IIP<br/>(N=90)</b>                                                                | <b>CTD-ILD<br/>(N=148)</b>                                                             | <b>Other<br/>(N=34)</b>                                                            | <b>Total<br/>(N=847)</b>                                                                  |
|--------------------------------------------------------------------------------------|------------------------------------------------------------------------------------------|--------------------------------------------------------------------------------------|----------------------------------------------------------------------------------------|------------------------------------------------------------------------------------|-------------------------------------------------------------------------------------------|
| Baseline Age<br>n<br>Mean (SD)<br>Median<br>Min-max                                  | 575<br>71.0 (8.0)<br>71.3<br>23.0-91.9                                                   | 90<br>65.1 (10.8)<br>67.3<br>33.8-85.2                                               | 148<br>61.3 (12.4)<br>62.7<br>19.8-86.6                                                | 34<br>62.7 (10.7)<br>62.1<br>44.9-84.9                                             | 847<br>68.3 (10.2)<br>69.8<br>19.8-91.9                                                   |
| Sex<br>Female<br>Male                                                                | 156 (27.1%)<br>419 (72.9%)                                                               | 29 (32.3%)<br>61 (67.8%)                                                             | 94 (63.5%)<br>54 (36.5%)                                                               | 17 (50%)<br>17 (50%)                                                               | 296 (35.0%)<br>551 (65.0%)                                                                |
| Race/ethnicity<br>White<br>Nonwhite                                                  | 544 (94.6%)<br>31 (5.4%)                                                                 | 80 (88.9%)<br>10 (11.1%)                                                             | 115 (77.7%)<br>33 (22.3%)                                                              | 30 (88.2%)<br>4 (11.8%)                                                            | 769 (90.8%)<br>78 (9.2%)                                                                  |
| BMI<br>n<br>Mean (SD)<br>Median<br>Min-max                                           | 533<br>29.19 (5.4)<br>28.5<br>15.3-59.4                                                  | 84<br>30.9 (7.3)<br>30.1<br>12.8-58.3                                                | 138<br>29.8 (7.5)<br>28.7<br>12.1-63.3                                                 | 34<br>28.0 (6.2)<br>28.2<br>17.2-39.9                                              | 789<br>29.4 (6.1)<br>28.7<br>12.1-63.3                                                    |
| Tobacco Use History<br>Current<br>Former<br>Never                                    | 2 (0.003%)<br>358 (62.2%)<br>415 (72.2%)                                                 | 4 (4.4%)<br>42 (46.7%)<br>44 (48.9%)                                                 | 3 (2.0%)<br>63 (42.6%)<br>82 (55.4%)                                                   | 2 (5.9%)<br>16 (47.1%)<br>16 (47.1%)                                               | 11 (1.3%)<br>479 (56.6%)<br>357 (42.1%)                                                   |
| Time from IPF diagnosis to<br>baseline (days)<br>n<br>Mean (SD)<br>Median<br>Min-max | 575<br>942.3 (982)<br>622<br>-3-6712                                                     | 90<br>1148.7 (1369)<br>590.5<br>-8-6332                                              | 148<br>1315.8 (1305)<br>858.5<br>0-5694                                                | 34<br>1438.6 (1334)<br>948.5<br>26-5166                                            | 847<br>1049.4 (1114)<br>680<br>-8-6712                                                    |
| Standard of Care at Enrollment<br>Pirfenidone<br>Nintedanib<br>Neither               | 221 (38.4%)<br>172 (29.9%)<br>182 (31.7%)                                                | 5 (5.6%)<br>4 (4.4%)<br>81 (90%)                                                     | 4 (2.7%)<br>0<br>144 (97.3%)                                                           | 4 (12.5%)<br>1 (3.1%)<br>27 (84.4%)                                                | 234 (27.6%)<br>177 (20.9%)<br>436 (51.5%)                                                 |
| Baseline %FVC<br>n<br>Mean (SD)<br>Median<br>Min-max<br><br><50%<br>50-80%<br>≥80%   | 537<br>68.5 (16.8)<br>67.8<br>27.4-120.4<br><br>74 (13.8%)<br>328 (61.1%)<br>135 (25.1%) | 84<br>72.2 (20.5)<br>70.0<br>26.8-117.5<br><br>9 (10.7%)<br>47 (60.0%)<br>28 (33.3%) | 138<br>68.7 (19.1)<br>65.6<br>29.3-120.2<br><br>22 (15.9%)<br>82 (59.4%)<br>34 (24.6%) | 34<br>71.1 (20.6)<br>67.1<br>25.4-117.2<br><br>3 (8.8%)<br>22 (64.7%)<br>9 (26.5%) | 793<br>69.0 (17.8)<br>67.5<br>25.4-120.4<br><br>108 (13.6%)<br>479 (60.4%)<br>206 (25.9%) |
| Baseline FEV1/FVC<br>n<br>Mean (SD)<br>Median<br>Min-max                             | 537<br>0.82 (0.08)<br>0.82<br>0.45-1.56                                                  | 84<br>0.81 (0.11)<br>0.80<br>0.51-1.32                                               | 138<br>0.80 (0.09)<br>0.81<br>0.52-1.26                                                | 34<br>0.79 (0.08)<br>0.79<br>0.58-0.95                                             | 793<br>0.8 (0.1)<br>0.8<br>0.4-1.6                                                        |
| Baseline Hgb-corrected DLCO (%<br>predicted)<br>n                                    | 215                                                                                      | 45                                                                                   | 58                                                                                     | 14                                                                                 | 332                                                                                       |

|                                                                   |                                            |                                           |                                            |                                            |                                            |
|-------------------------------------------------------------------|--------------------------------------------|-------------------------------------------|--------------------------------------------|--------------------------------------------|--------------------------------------------|
| Mean (SD)<br>Median<br>Min-max                                    | 39.8 (14.2)<br>38.7<br>9.8-93.3            | 46.2 (20.1)<br>43.1<br>14.8-98.4          | 46.1 (19.1)<br>43.1<br>10.4-96.6           | 38.6 (19.2)<br>39.2<br>7.7-75.3            | 41.7 (16.4)<br>40.0<br>7.7-98.4            |
| FVC Slope 1 Year (L/year)<br>n<br>Mean (SD)<br>Median<br>Min-max  | 469<br>-0.13 (0.45)<br>-0.11<br>-2.17-1.99 | 70<br>-0.04 (0.43)<br>-0.07<br>-1.22-1.22 | 111<br>-0.06 (0.36)<br>-0.07<br>-1.02-1.86 | 28<br>0.11.2 (0.55)<br>-0.05<br>-0.47-2.23 | 688<br>-0.10 (0.44)<br>-0.09<br>-2.17-2.23 |
| FVC Slope 2 Years (L/year)<br>n<br>Mean (SD)<br>Median<br>Min-max | 485<br>-0.16 (0.37)<br>-0.13<br>-2.17-1.65 | 75<br>-0.09 (0.34)<br>-0.08<br>-1.22-0.97 | 120<br>-0.03 (0.28)<br>-0.03<br>-0.75-1.86 | 29<br>0.02 (0.34)<br>-0.02<br>-0.63-1.09   | 719<br>-0.12 (0.35)<br>-0.09<br>-2.17-1.86 |
| Corticosteroids*<br>Yes<br>No                                     | 189 (32.9%)<br>386 (67.1%)                 | 50 (55.6%)<br>40 (44.4%)                  | 105 (70.9%)<br>43 (29.1%)                  | 27 (79.4%)<br>7 (20.6%)                    | 371 (43.8%)<br>476 (56.2%)                 |
| Immunosuppressants**<br>Yes<br>No                                 | 41 (7.1%)<br>534 (92.9%)                   | 42 (46.7%)<br>48 (53.3%)                  | 134 (90.5%)<br>14 (9.5%)                   | 13 (38.2%)<br>21 (61.8%)                   | 230 (27.2%)<br>617 (72.8%)                 |

\*Conmed Group: Corticosteroids at any time (to treat lung condition) (Do not include topical treatments)

\*\* Conmed Groups: Mycophenolate (CellCept, etc.), Hydroxychloroquine (Plaquenil, etc.), Rituximab (Rituxan, etc.), Azathioprine (Imuran, etc.), Tacrolimus (Prograf, etc.), Cyclosporin A (Cyclosporine modified, Gengraf, Neoral, Restasis, Sandimmune, Sandoz Cyclosporine, etc.), Adalimumab (Humira, etc.), Etanercept (Enbrel, etc.), Tocilizumab (Actemra, etc.), Infliximab (Remicade, etc.), Cyclophosphamide (Cytoxan, etc.), Methotrexate (Trexall, etc.), Abatacept (Orencia, etc.), Golimumab (Simponi, etc.), Leflunomide (Arava, etc.), Belimumab (Benlysta, LymphoStat-B, etc.); at any time

**Supplementary Table 2**

| Diagnosis Subgroup |                                                                                                                                                                                                                                                                                                                                                                                                                                                                                                                                                                                                                                                                                                                                                                                                                                                                                                                                   |
|--------------------|-----------------------------------------------------------------------------------------------------------------------------------------------------------------------------------------------------------------------------------------------------------------------------------------------------------------------------------------------------------------------------------------------------------------------------------------------------------------------------------------------------------------------------------------------------------------------------------------------------------------------------------------------------------------------------------------------------------------------------------------------------------------------------------------------------------------------------------------------------------------------------------------------------------------------------------|
| IPF (N=575)        | "IIP: Idiopathic pulmonary fibrosis"                                                                                                                                                                                                                                                                                                                                                                                                                                                                                                                                                                                                                                                                                                                                                                                                                                                                                              |
| IIP (N=90)         | "IIP: Unclassifiable"<br>"IIP: Nonspecific interstitial pneumonia (NSIP) - Fibrotic"<br>"IIP: Lymphocytic interstitial pneumonia (LIP)"<br>"IIP: Desquamative interstitial pneumonitis (DIP)"<br>"IIP: Nonspecific interstitial pneumonia (NSIP) - Cellular"<br>"IIP: Cryptogenic organizing pneumonitis (COP)"<br>"IIP: Pleuroparenchymal fibroelastosis (PPFE)"                                                                                                                                                                                                                                                                                                                                                                                                                                                                                                                                                                 |
| CTD-ILD (N=148)    | "Collagen Vascular Disease/Autoimmune Diseases: Rheumatoid arthritis"<br>"Collagen Vascular Disease/Autoimmune Diseases: Antisynthetase syndrome" "Collagen Vascular Disease/Autoimmune Diseases: Systemic sclerosis/scleroderma"<br>"Collagen Vascular Disease/Autoimmune Diseases: Sjogrens syndrome"<br>"Collagen Vascular Disease/Autoimmune Diseases: Polymyositis/Dermatomyositis"<br>"Collagen Vascular Disease/Autoimmune Diseases: Systemic lupus erythematosus"<br>"Collagen Vascular Disease/Autoimmune Diseases: Undifferentiated connective tissue disease"<br>"Collagen Vascular Disease/Autoimmune Diseases: Mixed connective tissue disease"<br>"Collagen Vascular Disease/Autoimmune Diseases: ANCA - vasculitis/pulmonary capillaritis/vasculitis"<br>"Collagen Vascular Disease/Autoimmune Diseases: Ankylosing spondylitis" "Collagen Vascular Disease/Autoimmune Diseases: Granulomatosis with polyangiitis" |
| Other (N=34)       | "Hypersensitivity pneumonitis: Other (specify)"<br>"Occupational exposure: Asbestosis"<br>"Occupational exposure: Berylliosis"<br>"Occupational exposure: Hard metal" "Occupational exposure: Other (specify)"<br>"Other specific ILD: Chronic aspiration"<br>"Other specific ILD: Pulmonary Langerhans cell histiocytosis (Eosinophilic granuloma)"<br>"Other specific ILD: Other (specify)"<br>"Drug or Treatment Induced: Radiation"<br>"Drug or Treatment Induced: Nitrofurantoin (Macrobid / Macrochantin)"<br>"Drug or Treatment Induced: Other (specify)"                                                                                                                                                                                                                                                                                                                                                                  |

**Supplementary Table 3**

| Baseline Characteristic                             | Healthy Controls (N=30)         |
|-----------------------------------------------------|---------------------------------|
| Baseline Age<br>n<br>Mean (SD)<br>Median<br>Min-max | 30<br>66.9 (6.0)<br>65<br>60-82 |
| Sex<br>Female<br>Male                               | 6 (20%)<br>24 (80%)             |
| Race/ethnicity<br>White<br>Nonwhite                 | 27 (90%)<br>3 (10%)             |

**Supplementary Table 4:**

Associations of Baseline Biomarkers with FVC Slope. SP-D or Periostin levels were used in a linear regression analysis to predict FVC slope over one year, with and without adjustment for baseline patient characteristics.

| Covariates Used for Adjustment | SP-D<br>FVC Slope over 1 year |           | Periostin<br>FVC Slope over 1 year |         |
|--------------------------------|-------------------------------|-----------|------------------------------------|---------|
|                                | Adjusted R <sup>2</sup>       | p-value   | Adjusted R <sup>2</sup>            | p-value |
| None                           | 0.01506                       | 0.000733  | 0.005066                           | 0.0345  |
| Baseline FVC                   | 0.02042                       | 0.0004382 | 0.009228                           | 0.01802 |
| Age                            | 0.01363                       | 0.00352   | 0.003638                           | 0.1061  |
| Sex                            | 0.01377                       | 0.003189  | 0.00374                            | 0.1025  |
| Height                         | 0.01363                       | 0.003354  | 0.003996                           | 0.09385 |

**Supplementary Figure 1:**  
Subsets of Biomarkers Correlated Across ILD Diagnosis Groups

IPF

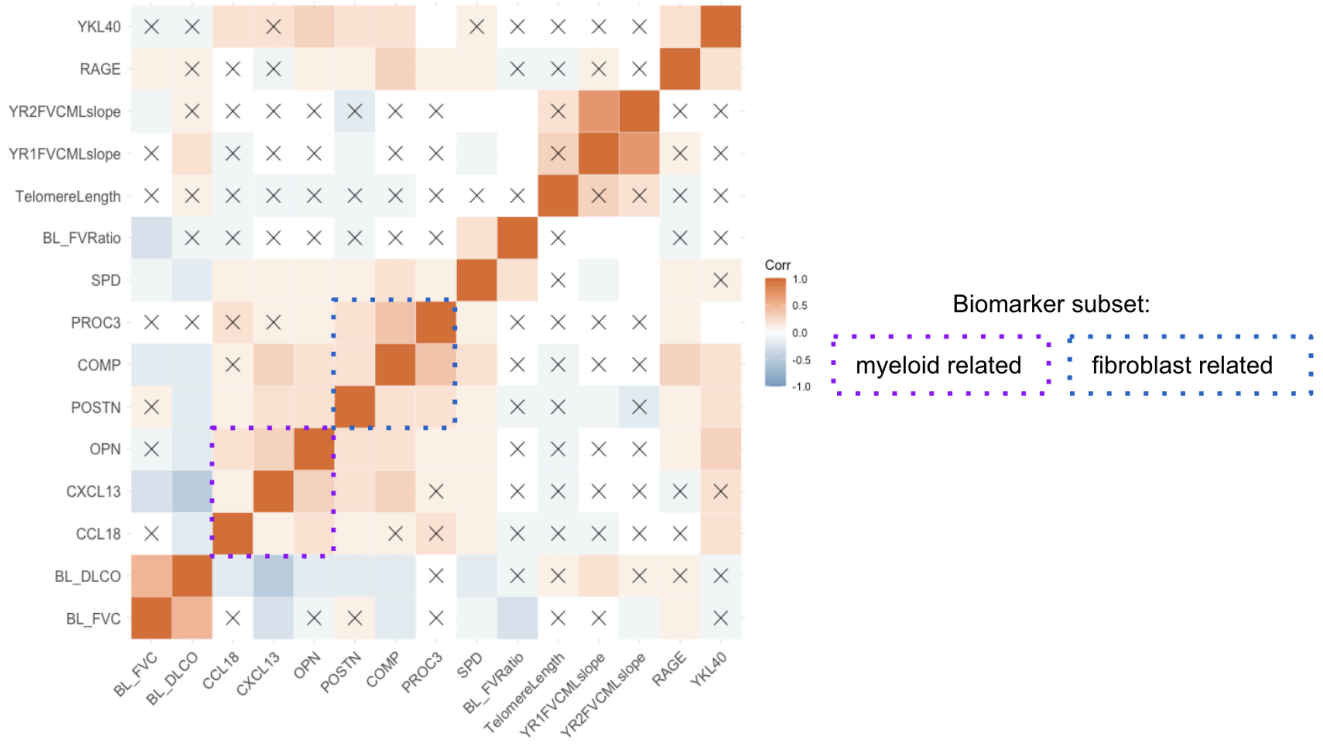

CTD-ILD

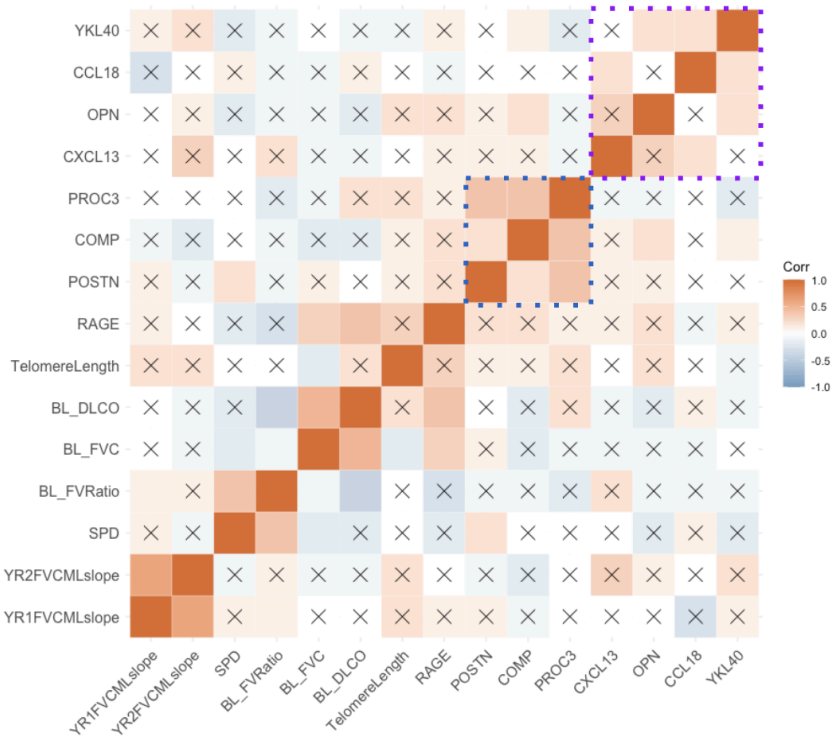

## IIP

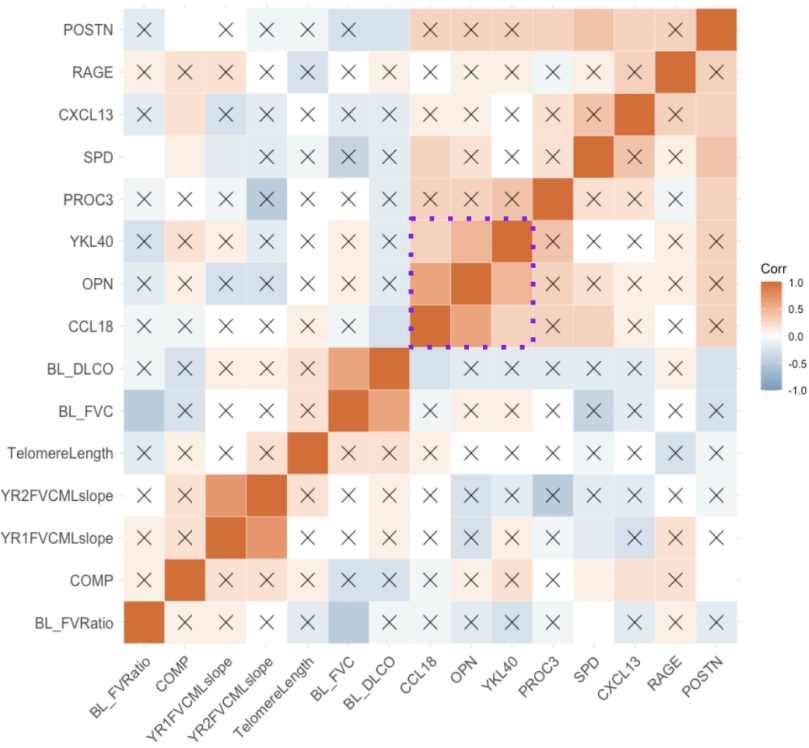

## Other

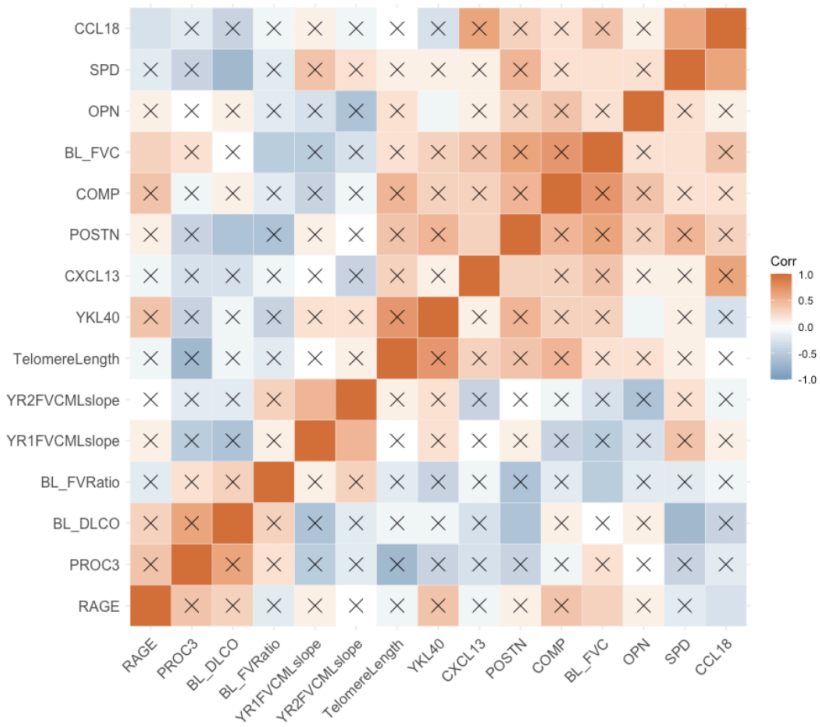

Spearman correlations shown  
 "X" indicates non-significant p-value

**Supplementary Figure 2**

Time to Relative Decline in FVC% predicted  $\geq 10\%$ , death, or respiratory hospitalization - Stratified by Biomarker Level

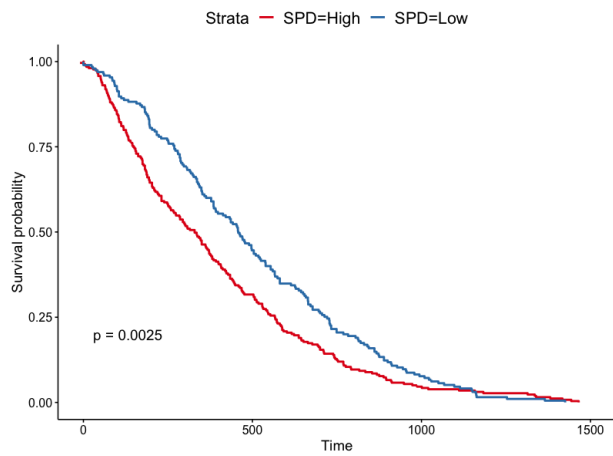

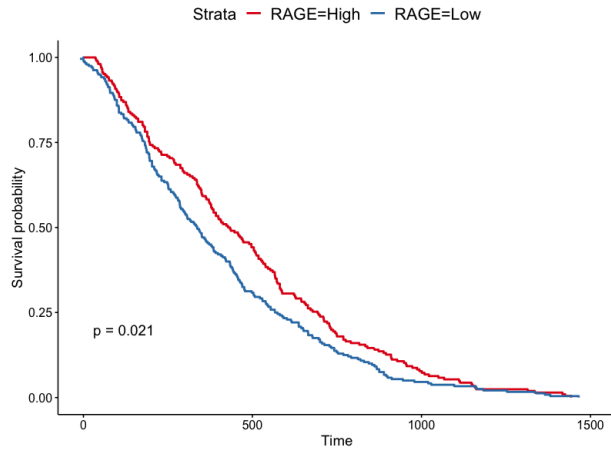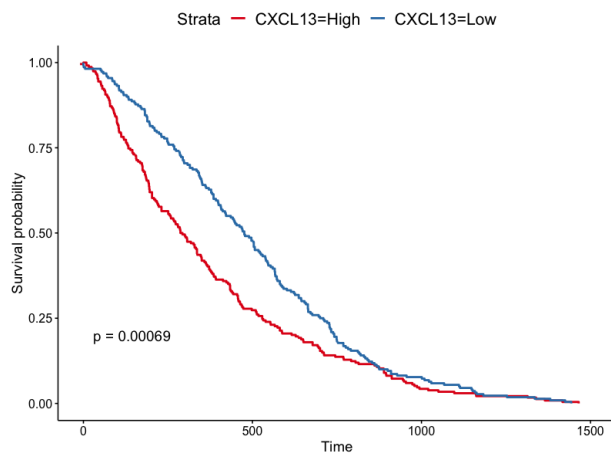

Patients were stratified by median biomarker level into High and Low groups. Time to endpoint analysis was done using relative decline in FVC%, death, or respiratory hospitalization. Time is shown in days on the x-axis. Regular log-rank test was used to determine p-values.

**Supplementary Figure 3**  
 Biomarker Levels in Progressors/Non-progressors



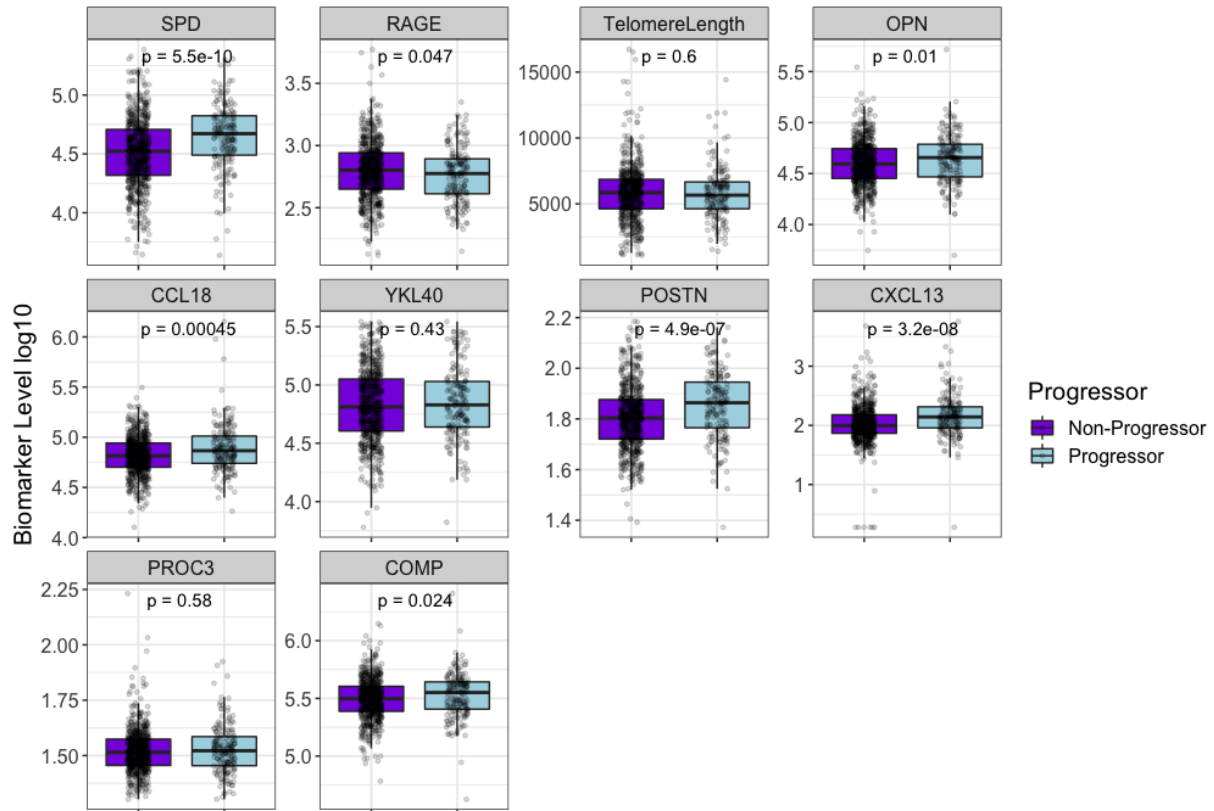

The full patient cohort was evaluated for progression over one year. Progression was defined by FVC% decline  $\geq 10\%$ , death, or lung transplant. 186 out of 847 (22%) patients were selected as progressors using this criteria. Differences in biomarker level were compared using unadjusted t-tests.
